# Supplementary material for: Genomic profiles of primary and metastatic esophageal adenocarcinoma identified via digital sorting of pure cell populations: results from a case report
Source: PubMed Central journal article supplement (PMC6134594; doi:10.1186/s12885-018-4789-4), 2018-09-12

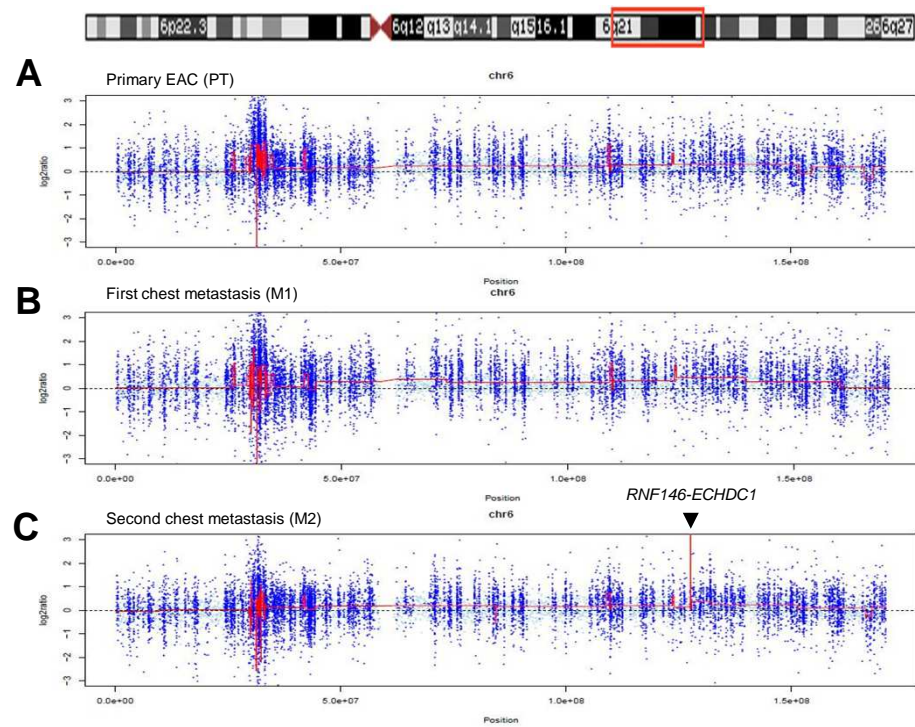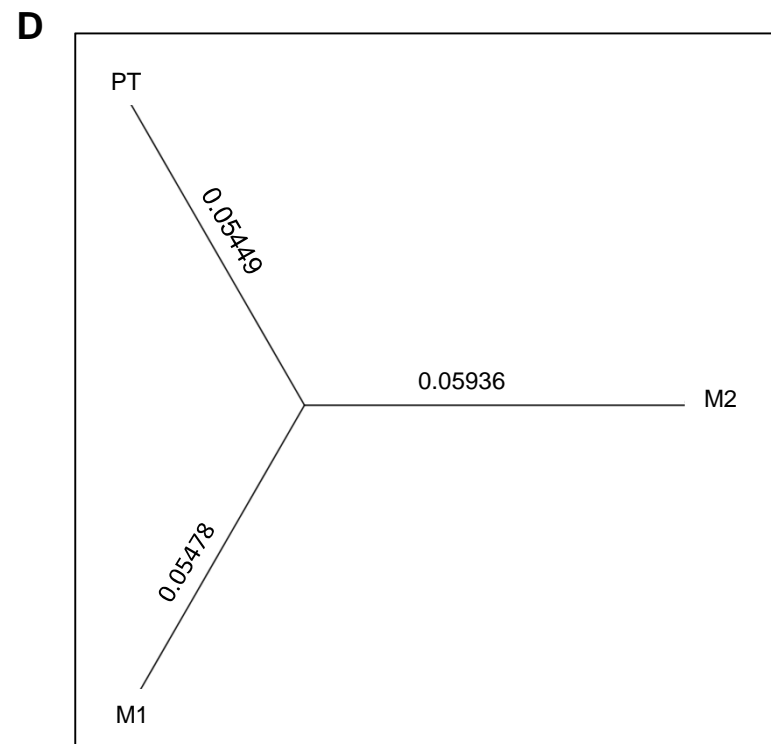

Supplement: 12885_2018_4789_MOESM2_ESM.pdf [file 12885_2018_4789_MOESM2_ESM.pdf]
